# Supplementary material
Source: PubMed Central journal article supplement (PMC3025477)
Supplement: NIHMS259678-supplement-Supp1.pdf [file NIHMS259678-supplement-Supp1.pdf]

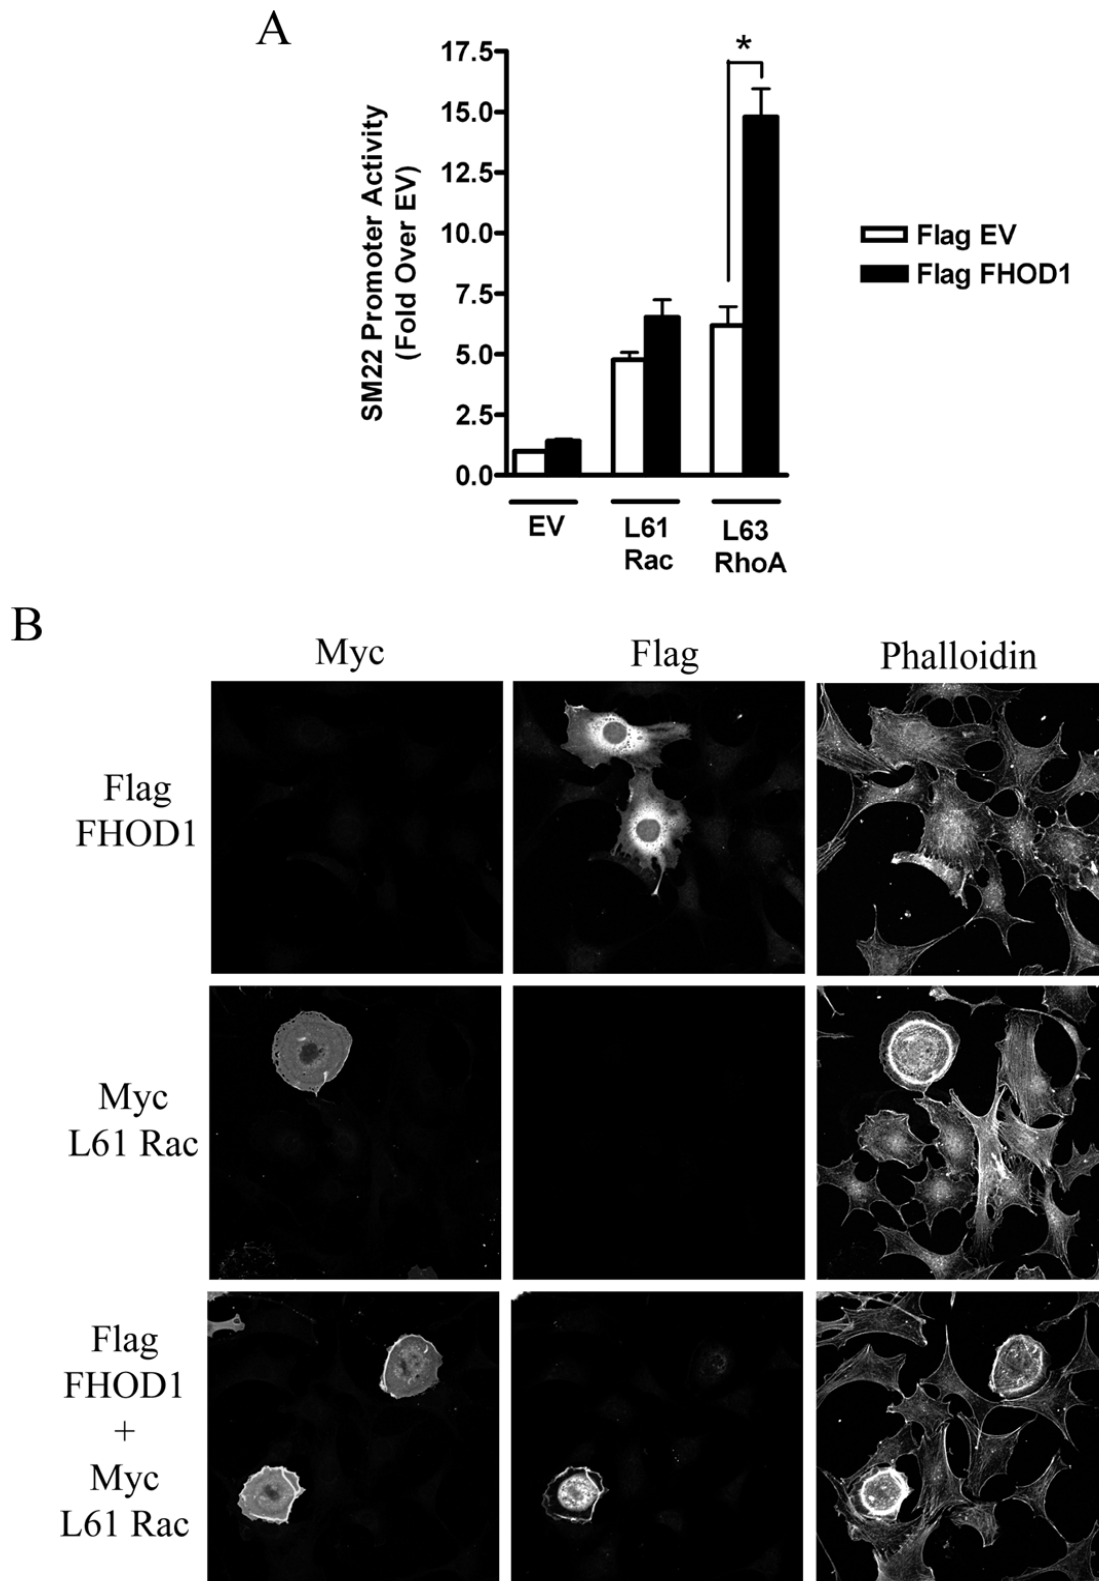

**Figure SI. Rac regulates subcellular localization of FHOD1 but not its transcriptional activity.** **A)** 10T1/2 cells were transfected with the SM22 luciferase reporter, flag-FHOD1 (110ng), and 15ng of flag empty vector (EV), L61 Rac, or L63 RhoA (15ng). Luciferase activity measured 24h post-transfection. **B)** Flag-FHOD1 was co-transfected into 10T1/2 cells with or without L61 Rac. Actin polymerization was visualized with phalloidin.
